# Supplementary material
Source: PubMed Central journal article supplement (PMC7875503)
Supplement: develop-148-195230-s1.pdf [file develop-148-195230-s1.pdf]

Table S1. Ectopic expression of Brachyury: DeSeq analysis of differential expression

[Click here to Download Table S1](#)

Table S2. Differential expression of tissue markers in response to ectopic Brachyury, Foxa.a and/or Mnx expression

[Click here to Download Table S2](#)

Table S3. Summary of all differential expression results for notochord enriched genes

[Click here to Download Table S3](#)

Table S4. Transcription factors with decreased expression in response to loss of FGF signaling by MEK inhibition

[Click here to Download Table S4](#)

Table S5. Ectopic expression of Brachyury, Foxa.a and Mnx: DeSeq analysis of differential expression

[Click here to Download Table S5](#)

Table S6. In situ probe cloning primers

[Click here to Download Table S6](#)
